# Supplementary material for: Sustainable glycerol carbonate electrolytes for Li-ion supercapacitors: performance evaluation of butyl, benzyl, and ethyl glycerol carbonates
Source: Royal Society of Chemistry journal article supplement (doi:10.1039/d1ma00547b), 2021-01-01
Supplement: d1ma00547b1.pdf [file d1ma00547b1.pdf]

## Sustainable Glycerol Carbonate Electrolytes for Li-ion Supercapacitors: Performance Evaluation of Butyl, Benzyl, and Ethyl Glycerol Carbonates

Maryam Salari,<sup>a</sup> Jennifer Chapman Varela,<sup>a</sup> Heng Zhang,<sup>a</sup> and Mark W Grinstaff<sup>a,b</sup>

<sup>a</sup> Department of Chemistry, <sup>b</sup> Department of Biomedical Engineering.

Corresponding Author: Mark W. Grinstaff ([mgrin@bu.edu](mailto:mgrin@bu.edu))

Figure S1: Thermal Gravimetric Analysis (TGA) of 3-Ethoxy-1,2-propylene carbonate (Ethyl GlyC).

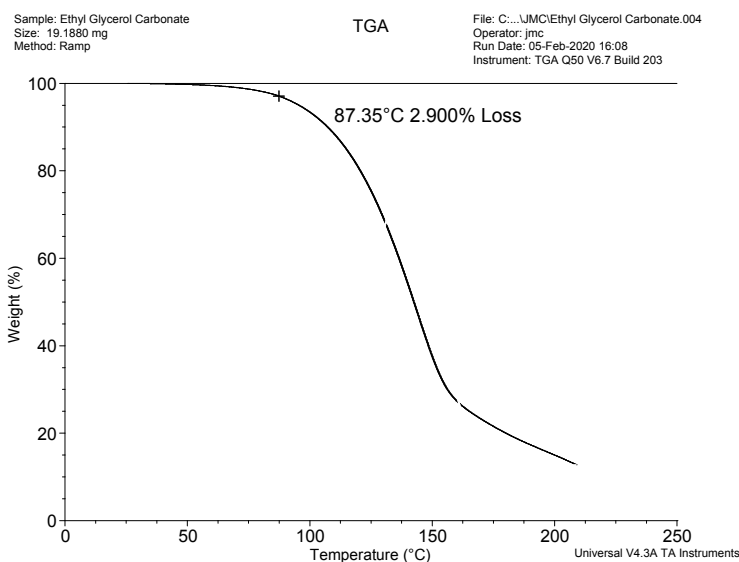

Figure S2: Thermal Gravimetric Analysis (TGA) of 3-benzyloxy-1,2-propylene carbonate (Benzyl GlyCs).

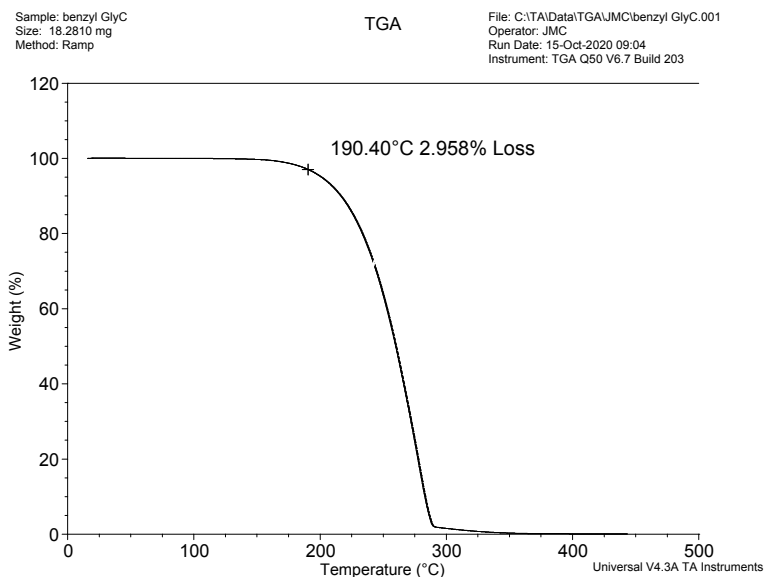

Figure S3: Thermal Gravimetric Analysis (TGA) of 3-Butoxy-1,2-propylene carbonate (Butyl GlyCs).

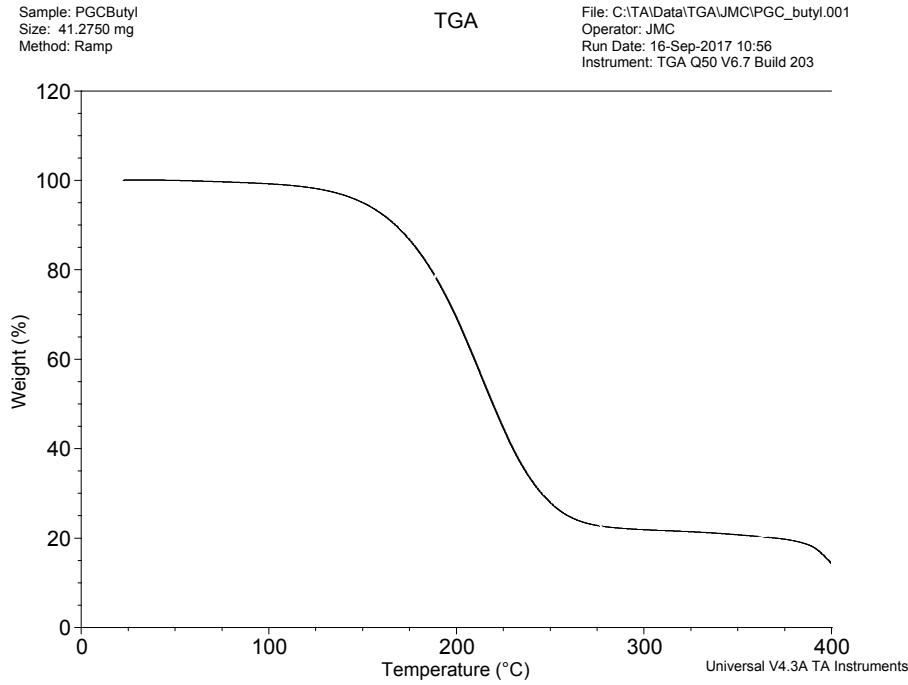

Figure S4: Complex viscosity versus temperature of the three glycerol carbonates from 20 °C to 100 °C.

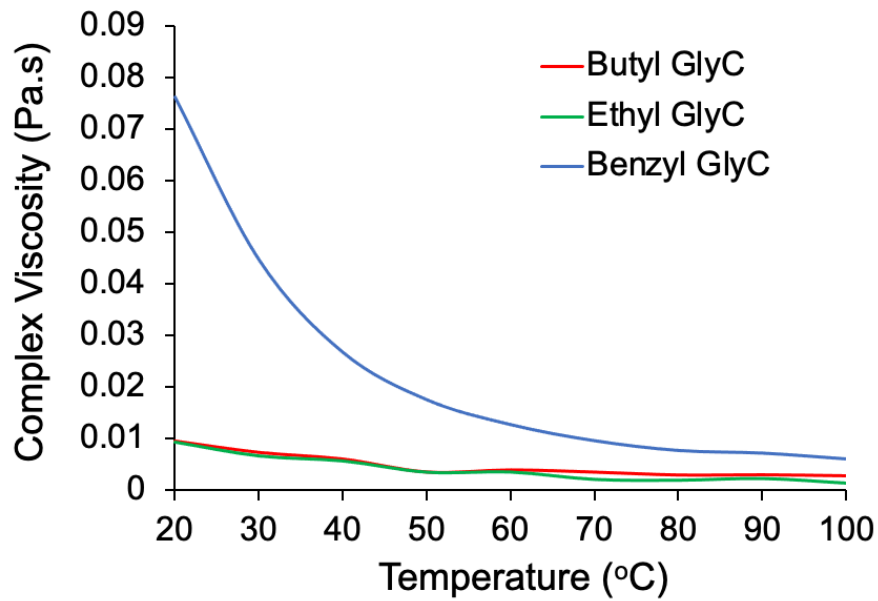

Table 1: Comparison of AC based Supercapacitors in Literatures

| Electrode                                                               | Electrolyte                                                                               | Discharge capacitance | Temperature (°C) | Cycle No.                   | Publication                                                                                                                    |
|-------------------------------------------------------------------------|-------------------------------------------------------------------------------------------|-----------------------|------------------|-----------------------------|--------------------------------------------------------------------------------------------------------------------------------|
| AC                                                                      | 1.6 M Tetraethylammonium tetrafluoroborate in ACN                                         | 26                    | Room             | Not listed                  | Ref. 23<br><br>DOI:10.1039/C9TA00154A                                                                                          |
| Activated carbon, carbon black, and PvdF binder                         | N-methyl-N-methoxymethyl-piperidinium-bis(trifluoromethylsulfonyl)imide with 1.0 M LiTFSI | 36 F/g                | 100 °C           | + 10,000                    | Ref. 6<br>DOI:<br>10.1039/C8CC01093E                                                                                           |
| CECA Acticarbone AB activated carbon (microporous) and PTFE binder      | 1-Butyl-1-methylpyrrolidinium bis(trifluoromethylsulfonyl)imide                           | 90 F/g                | 60 °C            | 40 000                      | Ref. 5<br>DOI:<br>10.1016/j.jpowsour.2006.12.048                                                                               |
| Lignin: PVA carbon fiber mats                                           | 1-Butyl-1-methylpyrrolidinium bis(trifluoromethylsulfonyl)imide: PC:EC system             | 72 F/g                | Room             | +1000                       | Ref. 32<br>DOI: 10.1088/1361-6528/aafe95                                                                                       |
| Activated carbon, carbon black, and carboxymethyl cellulose salt binder | 1-Butyl-1-methylpyrrolidinium bis(trifluoromethylsulfonyl)imide                           | 145 F/g               | 80 °C            | Not listed                  | Ref. 9<br>DOI:<br>10.1039/c2ra20177a                                                                                           |
| Graphene Nanosheets                                                     | 1-Allyl-3-methylimidazolium -{OTf; TFA; BF4 or PF6, TFSI, DCA}                            | 52- 30 F/g 0.5 A/g    | Room             | Not listed                  | Ref. 29<br>DOI:<br>10.1016/j.molliq.2017.11.078                                                                                |
| Activated carbon                                                        | (Tributyl-phosphine tetrafluoroborate) with ACN (X <sub>ACN</sub> =0.86)                  | 120 F/g               | 50 C             | 1000                        | Ref. 34<br>DOI:<br><a href="https://doi.org/10.1016/j.elecom.2017.07.010">https://doi.org/10.1016/j.elecom.2017.07.010</a>     |
| Activated carbon                                                        | 4.09 M 1-Ethyl-3-methylimidazolium tetrafluoroborate /ACN                                 | 32 F/g                | Room             | +2000                       | Ref. 33<br>DOI:<br><a href="https://doi.org/10.1016/j.colsurfa.2020.124858">https://doi.org/10.1016/j.colsurfa.2020.124858</a> |
| Onion-like carbon, free of microporous                                  | 1-Ethyl-3-methylimidazolium bis(trifluoromethylsulfonyl)imide: tetrafluoroborate (80:20)  | ~25 F/g               | room             | 10,000<br>*elevated voltage | Ref. 27<br>DOI:<br>10.1002/anie.201412257                                                                                      |
| Activated carbon from furfuraldehyde                                    | 1-methyl-3-butyl-imidazolium tetrafluoroborate                                            | 111 F/g               | room             | Not listed                  | Ref. 28<br>DOI:<br>10.1016/j.electacta.2010.03.065                                                                             |
| Activated carbon                                                        | 1-propyl-1-methylpyrrolidinium bis(trifluoromethylsulfonyl)imide                          | 175 F/g               | 80 °C            | Not listed                  | Ref. 26<br>DOI:<br>10.1016/j.elecom.2011.07.010                                                                                |

|                                                                         |                                                                                                                                                                                                      |             |                      |                                        |                                                   |
|-------------------------------------------------------------------------|------------------------------------------------------------------------------------------------------------------------------------------------------------------------------------------------------|-------------|----------------------|----------------------------------------|---------------------------------------------------|
|                                                                         | gel                                                                                                                                                                                                  |             |                      |                                        |                                                   |
| D-glucose derived activated carbon powder                               | 5 wt% (1-Ethyl-3-methylimidazolium iodide) in 1-Ethyl-3-methylimidazolium Tetrafluoroborate                                                                                                          | ~245 F/g    | room                 | 2500                                   | Ref. 31<br>DOI:<br>10.1149/2.014403jes            |
| Waste watermelon rinds                                                  | 1-Ethyl-3-methylimidazolium - bis(trifluoromethylsulfonyl)imide                                                                                                                                      | 320 F/g     | 60 °C                | 10,000, lose 48% of discharge capacity | Ref. 25<br>DOI:<br>10.1016/j.jpowsour.2018.02.037 |
| Activated carbon                                                        | 1-methyl-1-propylpiperidinium trifluoromethanesulfonate, 1-methyl-1-propylpiperidinium bis(trifluoromethylsulfonyl)imide and 1-ethyl-3-methylimidazolium bis(trifluoro-methylsulfonyl)imide with ACN | 100-170 F/g | 60 °C                | 10,000                                 | Ref. 24<br>DOI:<br>10.1016/j.jpowsour.2016.05.008 |
| KOH-activated microwave exfoliated graphite oxide ('a-MEGO') electrodes | 1:1 (w/w) N-methyl-N-propylpiperidinium bis(fluorosulfonyl)imide: N-butyl-N-methylpyrrolidinium bis(fluorosulfonyl)-imide                                                                            | 130 F/g     | Room, various temps. | Not listed                             | Ref. 30<br>DOI:<br>10.1016/j.nanoen.2012.11.006   |
